# Supplementary material
Source: PubMed Central journal article supplement (PMC7725885)
Supplement: NIHMS1615935-supplement-supp_info.pdf [file NIHMS1615935-supplement-supp_info.pdf]

## Supplementary Information

### **The miRNA-mRNA Interactome of murine iPSC-derived Chondrocytes in Response to Inflammatory Cytokines**

Alison K. Ross<sup>1,2,3,4</sup>, Rodrigo Coutinho de Almeida<sup>5</sup>, Yolande F.M. Ramos<sup>5</sup>, Jiehan Li<sup>1,2,3,4</sup>, Ingrid Meulenbelt<sup>5</sup>, Farshid Guilak<sup>1,2,3,4</sup>

<sup>1</sup>Departments of Orthopaedic Surgery, Washington University, St. Louis, MO, USA

<sup>2</sup>Department of Biomedical Engineering, Washington University, St. Louis, MO, USA

<sup>3</sup>Shriners Hospitals for Children, St. Louis, MO, USA

<sup>4</sup>Center of Regenerative Medicine, Washington University, St. Louis, MO, USA

<sup>5</sup>Department of Biomedical Data Sciences, Section Molecular Epidemiology, Leiden University Medical Center, Leiden, The Netherlands

#### **Supplementary Figure Legends**

**Figure S1** Volcano plot visualization shows miRNAs that are differentially expressed compared to controls at each time point (red:  $p_{\text{adj}} < 0.05$ ). LFC,  $\log_2(\text{FoldChange})$ .

**Figure S2** Volcano plot visualization shows mRNAs that are differentially expressed compared to controls at each time point (red:  $p_{\text{adj}} < 0.05$ ,  $|\text{LFC}| > 1$ ). LFC,  $\log_2(\text{FoldChange})$ .

**Figure S3** From RNA-sequencing analysis, fold changes of miRNAs that are differentially expressed exclusively with **(A)** IL-1 $\beta$  or **(B)** TNF- $\alpha$  from RNA-sequencing analysis. LFC,  $\log_2(\text{FoldChange})$ .

**Figure S4** IL-1 $\beta$  miRNA-mRNA interactome at **(A)** 4, **(B)** 12, and **(C)** 24 hours. TNF- $\alpha$  miRNA-mRNA interactome at **(D)** 12 and **(E)** 24 hours. Network of conserved and predicted miRNA-mRNA target pairs that are differentially expressed, are changing expression levels in opposite directions, and have been experimentally validated in response to 1 ng/mL IL-1 $\beta$  or 20 ng/mL TNF- $\alpha$ , respectively. The color of the node indicates the LFC of the gene or miRNA and the size of the node is proportional to the number of connections. The thickness of the line corresponds to the context++ score from the TargetScan database. LFC,  $\log_2(\text{FoldChange})$ .

**Table S1** Enriched pathways of genes within each cluster in response to IL-1 $\beta$ . KEGG pathway analysis of the top 5 enriched pathways, ranked by p-value, and their associated genes.

**Table S2** Enriched pathways of genes within each cluster in response to TNF- $\alpha$ . KEGG pathway analysis of the top 5 enriched pathways, ranked by p-value, and their associated genes.

**Table S3** Enriched pathways of genes in response to IL-1 $\beta$  at each time point. KEGG pathway analysis of the top enriched pathways, ranked by p-value, and their associated genes.

**Table S4** Enriched pathways of genes in response to TNF- $\alpha$  at each time point. KEGG pathway analysis of the top enriched pathways, ranked by p-value, and their associated genes.

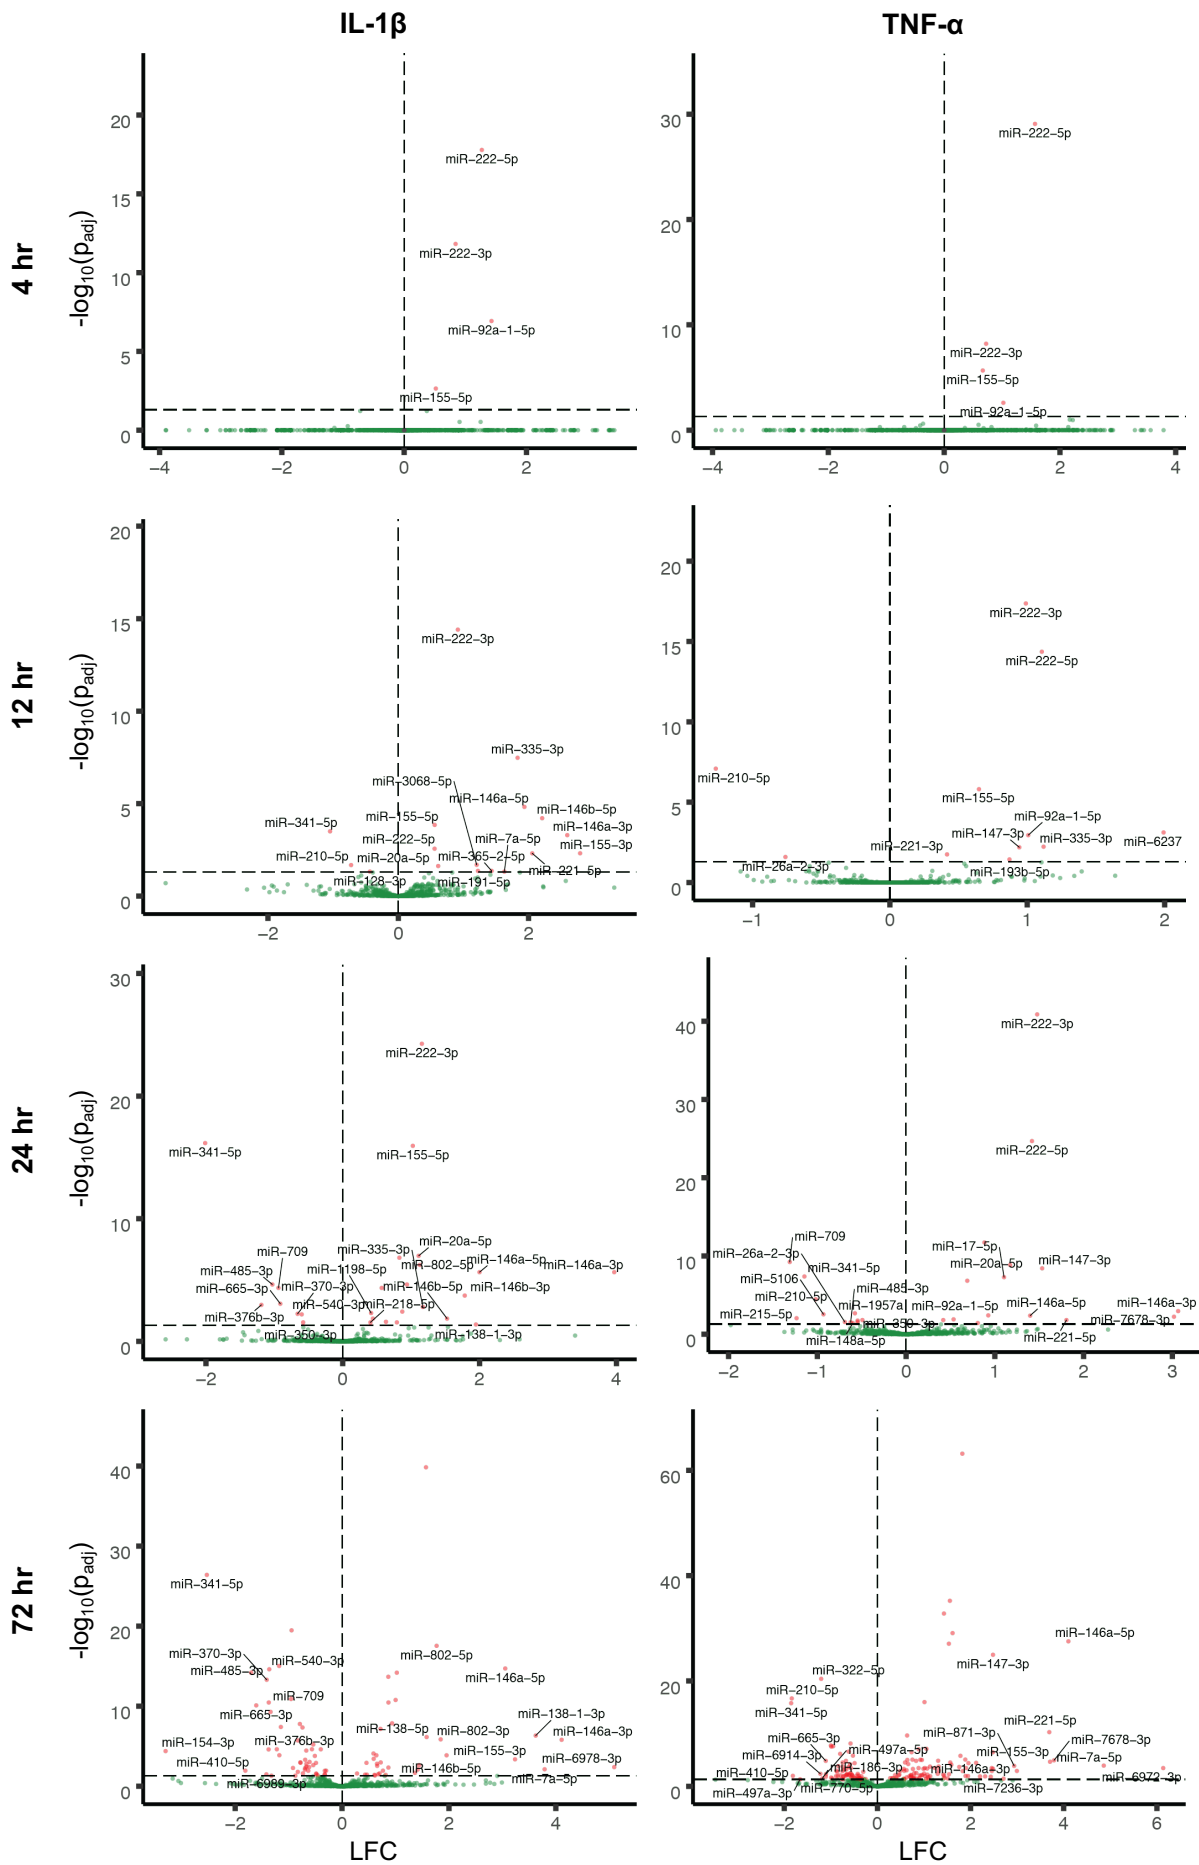

Figure S1

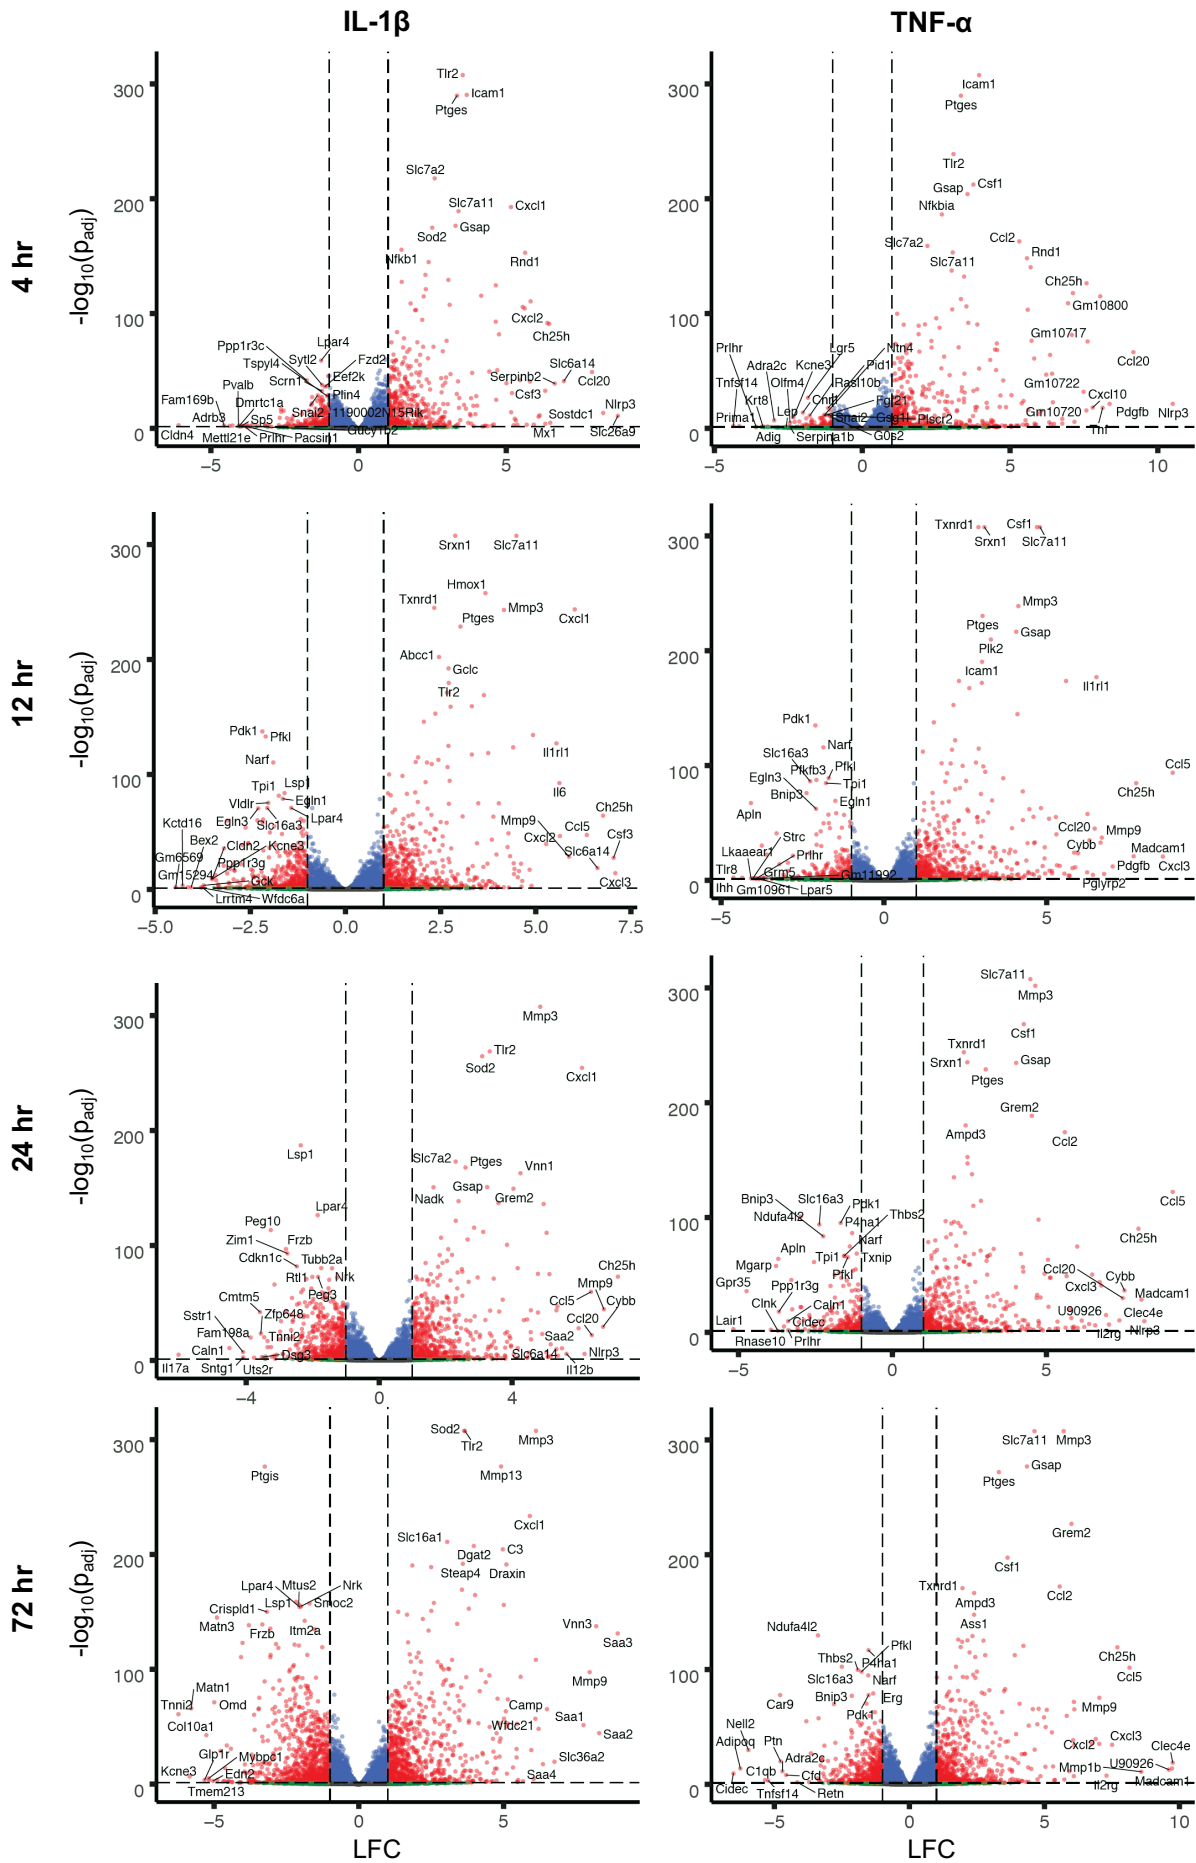

Figure S2

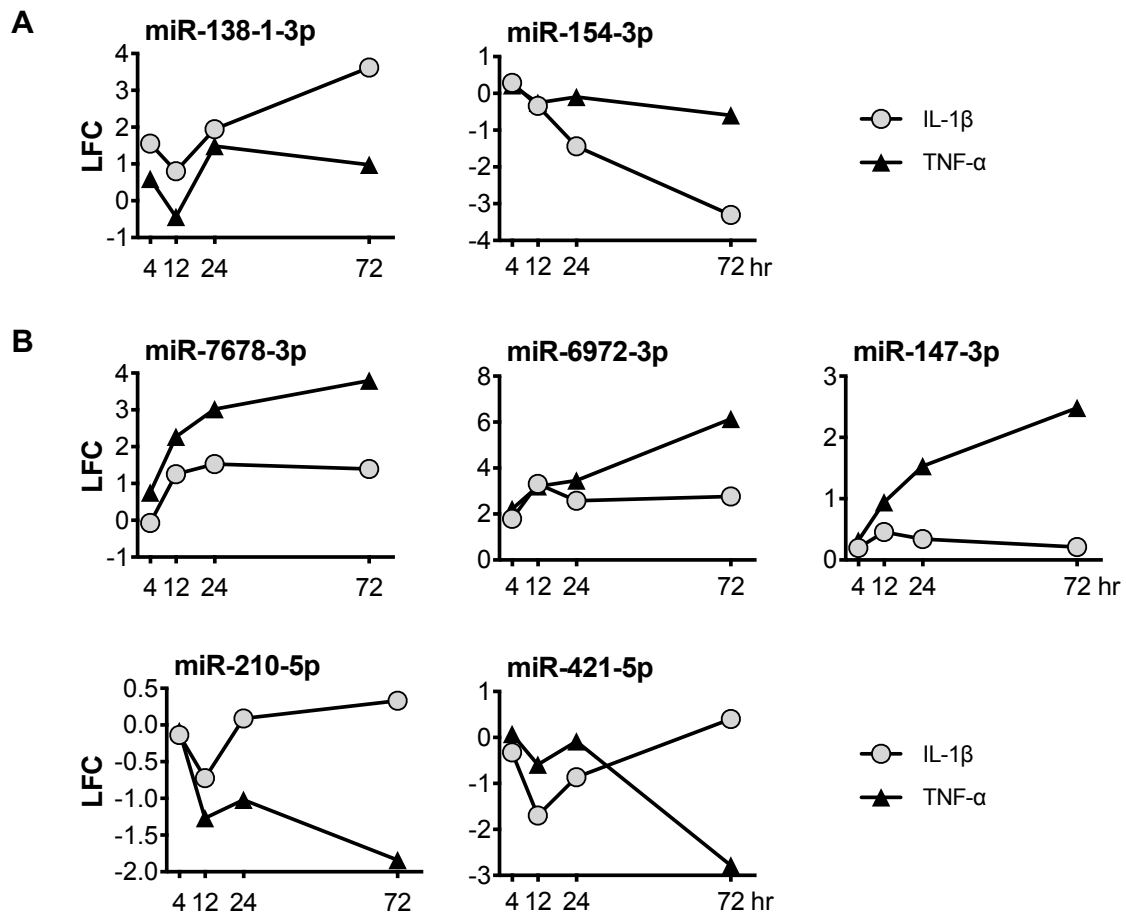

**Figure S3**

**A**

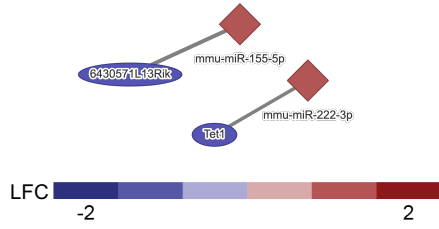

**B**

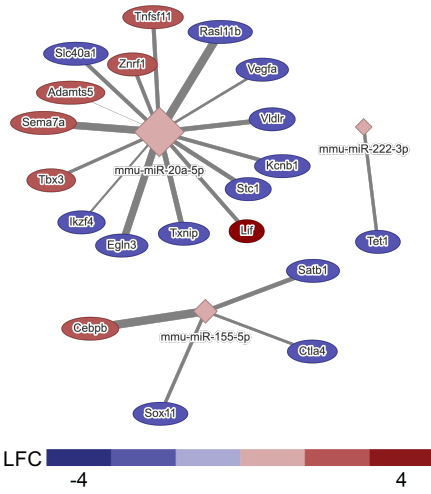

**C**

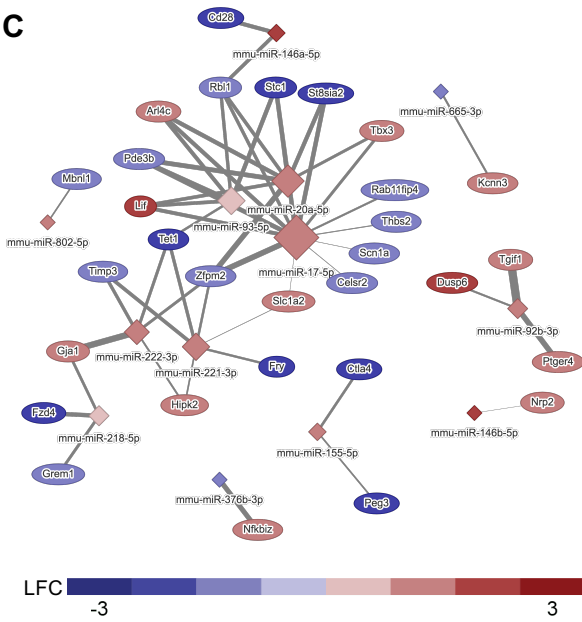

**D**

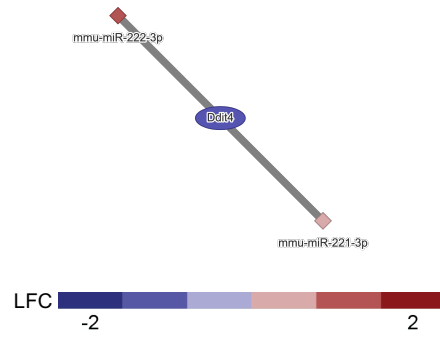

**E**

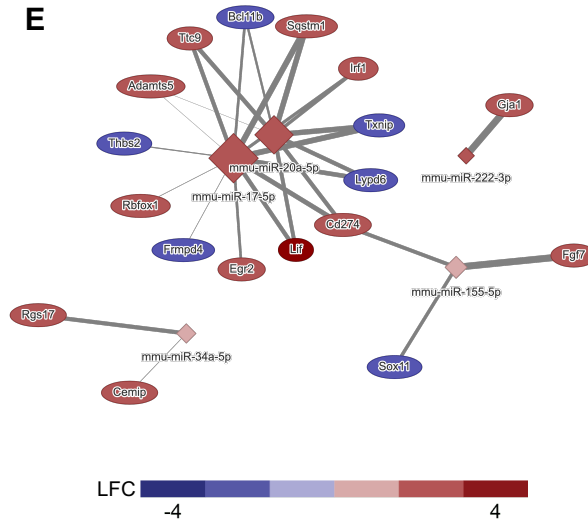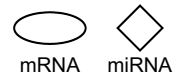

**Figure S4**

**Table S1** Enriched pathways of genes within each cluster in response to IL-1 $\beta$ .

|   | <b>Pathway</b>                                         | <b>P-value</b>         | <b>Genes</b>                                                                                                                                                                                                                                         |
|---|--------------------------------------------------------|------------------------|------------------------------------------------------------------------------------------------------------------------------------------------------------------------------------------------------------------------------------------------------|
| 1 | ECM-receptor interaction                               | 1.11x10 <sup>-12</sup> | <i>Sdc4; Lamb3; Gp1bb; Lama3; Tnc; Lamc2; Hmmer; Thbs2; Thbs1; Gp5; Col2a1; Reln; Sv2c; Col4a1; Col6a2; Chad; Col9a1; Col9a3; Col9a2; Cd44</i>                                                                                                       |
|   | TNF signaling pathway                                  | 2.66x10 <sup>-10</sup> | <i>Edn1; Ccl12; Csf2; Ccl20; Lif; Pik3cb; Nod2; Ptgs2; Tnf; Sele; Cxcl2; Nfkb1; Cx3cl1; Icam1; Cxcl10; Creb3l2; Ccl2; Junb; Map3k5; Creb5</i>                                                                                                        |
|   | PI3K-Akt signaling pathway                             | 1.48x10 <sup>-8</sup>  | <i>Pkn3; Lama3; Pdgfb; Tnc; Il6ra; Lamc2; Pik3cb; Fgf1; Thbs2; Areg; Fgf2; Thbs1; Pik3r5; Reln; Erbb4; Creb3l2; Chad; Fgf21; Lamb3; Igf2; Nfkb1; Ereg; Col2a1; Col4a1; Col6a2; Fgf18; Col9a1; Bcl2; Gnb3; Col9a3; Kras; Col9a2; Fgfr3; Creb5</i>     |
|   | Fluid shear stress and atherosclerosis                 | 2.95x10 <sup>-8</sup>  | <i>Edn1; Ccl12; Sdc4; Cav1; Pdgfb; Calml3; Plat; Pik3cb; Tnf; Prkcz; Sele; Nfkb1; Klf2; Actg1; Icam1; Nppc; Trpv4; Bcl2; Ccl2; Map3k5</i>                                                                                                            |
|   | Protein digestion and absorption                       | 1.53x10 <sup>-7</sup>  | <i>Col17a1; Col15a1; Col27a1; Kcne3; Eln; Col11a1; Col11a2; Slc1a5; Col2a1; Slc7a8; Col4a1; Col6a2; Col9a1; Col9a3; Col9a2</i>                                                                                                                       |
| 2 | Cytokine-cytokine receptor interaction                 | 1.03x10 <sup>-3</sup>  | <i>Gdf10; Il33; Bmp2; Mstn; Il1r1; Tnfsf10; Tnfsf8; Osmr; Prlr; Il13ra1; Bmp15</i>                                                                                                                                                                   |
|   | NOD-like receptor signaling pathway                    | 3.96x10 <sup>-3</sup>  | <i>Gsdmd; Gbp5; Oas3; Casp4; Tnfaip3; Gbp2; Nfkbib; Gbp3</i>                                                                                                                                                                                         |
|   | Influenza A                                            | 4.85x10 <sup>-3</sup>  | <i>Socs3; H2-dmb2; Il33; Rsad2; Oas3; Tnfsf10; Nfkbib</i>                                                                                                                                                                                            |
|   | Notch signaling pathway                                | 2.24x10 <sup>-2</sup>  | <i>Lfng; Rbpjl; Notch4</i>                                                                                                                                                                                                                           |
|   | Epstein-Barr virus infection                           | 2.35x10 <sup>-2</sup>  | <i>Rbpjl; H2-dmb2; Oas3; Tnfaip3; H2-q10; Tlr2; Nfkbib</i>                                                                                                                                                                                           |
| 3 | Drug Metabolism                                        | 4.00x10 <sup>-3</sup>  | <i>Ces2e; Gsto1; Gstp2; Gstp1; Aox1; Upb1; Xdh</i>                                                                                                                                                                                                   |
|   | IL-17 Signaling Pathway                                | 5.35x10 <sup>-3</sup>  | <i>Ccl7; Traf5; Cxcl1; Traf2; Ikbke; Cxcl5</i>                                                                                                                                                                                                       |
|   | Glycosphingolipid Biosynthesis                         | 7.89x10 <sup>-3</sup>  | <i>Fut9; St8sia1; A4galt; Ggta1</i>                                                                                                                                                                                                                  |
|   | TNF Signaling Pathway                                  | 1.31x10 <sup>-2</sup>  | <i>Jag1; Irf1; Ccl5; Traf5; Cxcl1; Traf2</i>                                                                                                                                                                                                         |
|   | Cytokine-cytokine Receptor Interaction                 | 1.45x10 <sup>-2</sup>  | <i>Ccr1; Il21; Cxcl9; Acvr1c; Ccl7; Ifngr2; Ccl5; Cxcl1; Il13ra2; Eda2r; Cxcl5</i>                                                                                                                                                                   |
| 4 | Arrhythmogenic right ventricular cardiomyopathy (ARVC) | 4.78x10 <sup>-5</sup>  | <i>Dsp; Ryr2; Cacng8; Itgb3; Itga10; Tcf7; Pkp2; Itga7; Sgcg; Itga9</i>                                                                                                                                                                              |
|   | Glutathione metabolism                                 | 1.03x10 <sup>-4</sup>  | <i>Gclc; Gsta4; Gsta3; Gss; G6pdx; Gsr; Gsta1; Pgd; Gclm</i>                                                                                                                                                                                         |
|   | Cytokine-cytokine receptor interaction                 | 4.50x10 <sup>-4</sup>  | <i>Il11; Csf3; Csf1; Gdf15; Il4ra; Il1f9; Cxcl3; Ngf; Il2rg; Cxcl14; Il17rb; Bmp6; Bmp3; Il1r1; Il6; Il18rap; Il7; Tnfsf4; Cd27; Il12rb1</i>                                                                                                         |
|   | Rheumatoid arthritis                                   | 8.19x10 <sup>-4</sup>  | <i>Mmp1b; Il11; Il6; Csf1; Cd80; Cd28; Atp6v0a4; Atp6v0e2; Atp6v1c2</i>                                                                                                                                                                              |
|   | Hematopoietic cell lineage                             | 1.83x10 <sup>-3</sup>  | <i>Il11; Cd24a; Csf3; Il6; Csf1; Il7; Itgb3; Il4ra; Cd14</i>                                                                                                                                                                                         |
| 5 | Metabolism of xenobiotics by cytochrome P450           | 2.52x10 <sup>-11</sup> | <i>Cbr2; Gstm2; Ugt2b34; Ugt1a1; Gstt4; Mgst1; Mgst2; Gstt1; Ugt1a6a; Ugt1a6b; Ugt1a7c; Hsd11b1; Adh1; Ugt1a5; Cyp1b1; Ugt1a2; Cyp2f2; Gstm7; Gstm6</i>                                                                                              |
|   | Pathways in cancer                                     | 9.36x10 <sup>-10</sup> | <i>Lamc3; Il23r; Calml4; Gli2; Fgf7; Il12b; Rac3; Pim2; Ifnar2; Pdgfra; Prkcb; Hgf; Mmp2; Wnt16; Mmp9; Pgf; Runx1; Plcb4; Il3ra; Pparg; Il6st; Birc3; Camk2b; Epas1; Lama1; Gstm4; Mgst1; Mgst2; Gstm7; Gstm6; Fgf10</i>                             |
|   | Drug metabolism                                        | 1.70x10 <sup>-8</sup>  | <i>Gstm2; Ugt2b34; Maob; Ugt1a1; Gstm4; Mgst1; Mgst2; Fmo1; Gstm7; Gstm6; Fgf10</i>                                                                                                                                                                  |
|   | Chemical carcinogenesis                                | 9.54x10 <sup>-8</sup>  | <i>Gstm2; Ugt2b34; Ugt1a1; Gstm4; Mgst1; Mgst2; Gstm7; Gstm6</i>                                                                                                                                                                                     |
|   | Cytokine-cytokine receptor interaction                 | 1.43x10 <sup>-6</sup>  | <i>Acvr11; Amhr2; Il23r; Csf2rb; Cxcl13; Acvr1b; Cxcl15; Ccl9; Ccl8; Ccl6; Ccl27a; Tnfsf11; Il12b; Ccr10; Ifnar2; Tnfsf14; Tnfsf15; Il10rb; Tgfb3; Il34; Tnfrsf9; Lifr; Inhbb; Il17re; Il17ra; Edar; Cxcl12; Il3ra; Tnfsf9; Fas; Il6st; Tnfrsf21</i> |

**Table S2** Enriched pathways of genes within each cluster in response to TNF- $\alpha$ .

|   | <b>Pathway</b>                               | <b>P-value</b>         | <b>Genes</b>                                                                                                                                                                                                                         |
|---|----------------------------------------------|------------------------|--------------------------------------------------------------------------------------------------------------------------------------------------------------------------------------------------------------------------------------|
| 1 | TNF signaling pathway                        | 8.39x10 <sup>-4</sup>  | <i>Mapk10; Ccl12; Vcam1; Irf1; Ccl2; Fas; Birc3</i>                                                                                                                                                                                  |
|   | Cytokine-cytokine receptor interaction       | 2.55x10 <sup>-3</sup>  | <i>Il33; Ccl12; Bmp2; Acvr1c; Fas; Ccl2; Il17re; Tnfrsf11a; Gdf6; Prrl; Il12rb2</i>                                                                                                                                                  |
|   | Malaria                                      | 4.62x10 <sup>-3</sup>  | <i>Ccl12; Vcam1; Hgf; Ccl2</i>                                                                                                                                                                                                       |
|   | Hippo signaling pathway                      | 6.66x10 <sup>-3</sup>  | <i>Wnt10a; Bmp2; Lef1; Gdf6; Wnt16; Nkd1; Actg1</i>                                                                                                                                                                                  |
|   | Wnt signaling pathway                        | 6.89x10 <sup>-3</sup>  | <i>Mapk10; Wnt10a; Lef1; Rspo3; Wnt16; Lgr5; Nkd1</i>                                                                                                                                                                                |
| 2 | Influenza A                                  | 1.14x10 <sup>-6</sup>  | <i>H2-eb1; Rsad2; Ddx58; Pik3cd; Oas1a; H2-aa; Oas1g; Ifih1; Oas2; Oas3; Tnfsf10; Irf7; Hspa1b</i>                                                                                                                                   |
|   | Epstein-Barr virus infection                 | 3.30x10 <sup>-5</sup>  | <i>Entpd1; H2-eb1; Syk; Ddx58; H2-q6; Oas1a; Pik3cd; Isg15; H2-aa; Oas1g; Oas2; Oas3; Irf7</i>                                                                                                                                       |
|   | NOD-like receptor signaling pathway          | 4.91x10 <sup>-5</sup>  | <i>Gsdmd; Panx1; Gbp7; Aim2; Ifi204; Oas2; Oas3; Irf7; Oas1a; Tmem173; Oas1g; Gbp3</i>                                                                                                                                               |
|   | Measles                                      | 5.03x10 <sup>-5</sup>  | <i>Ifih1; Ddx58; Oas2; Oas3; Irf7; Pik3cd; Oas1a; Il2rg; Hspa1b; Oas1g</i>                                                                                                                                                           |
|   | Cytokine-cytokine receptor interaction       | 1.03x10 <sup>-4</sup>  | <i>Cxcl9; Csf1; Ngf; Tnfrsf1b; Il2rg; Cxcl14; Cxcl15; Il1r1; Ccl9; Il1r2; Il18rap; Tnfsf4; Tnfsf10; Il12rb1</i>                                                                                                                      |
| 3 | TNF signaling pathway                        | 1.87x10 <sup>-12</sup> | <i>Edn1; Cebpb; Csf2; Ccl20; Lif; Tnfaip3; Cxcl1; Nod2; Ptgs2; Tnf; Sele; Cxcl2; Nfkb1; Cx3cl1; Icam1; Nfkbia; Cxcl10; Il6; Creb3l3; Junb; Creb5</i>                                                                                 |
|   | Cytokine-cytokine receptor interaction       | 2.45x10 <sup>-11</sup> | <i>Cntfr; Il1rn; Cd40; Csf3; Csf2; Il20rb; Cxcr4; Cxcl1; Cxcr6; Tnf; Cxcl2; Cx3cl1; Cxcl5; Bmp15; Tnfsf11; Il11; Tnfsf15; Ccl20; Tnfrsf19; Lif; Bmp8a; Il19; Gdf5; Bmp4; Cxcl10; Il6; Il23a; Il7; Lep; Tnfsf9; Inha; Il17a</i>       |
|   | Protein digestion and absorption             | 3.20x10 <sup>-11</sup> | <i>Col15a1; Col27a1; Kcne3; Eln; Col11a1; Col22a1; Col12a1; Col11a2; Col1a1; Col3a1; Col2a1; Col1a2; Slc7a8; Col5a1; Col9a1; Col9a3; Col9a2; Kcnn4</i>                                                                               |
|   | IL-17 signaling pathway                      | 2.93x10 <sup>-9</sup>  | <i>Csf3; Cebpb; Csf2; Ccl20; Tnfaip3; Cxcl1; Ptgs2; Cxcl2; Tnf; Cxcl5; Nfkb1; Nfkbia; Fosl1; Cxcl10; Il6; Il17a</i>                                                                                                                  |
|   | ECM-receptor interaction                     | 6.19x10 <sup>-9</sup>  | <i>Lama2; Tnc; Thbs2; Thbs4; Col1a1; Col2a1; Reln; Col1a2; Sv2b; Chad; Itga11; Col9a1; Col9a3; Col9a2; Cd44</i>                                                                                                                      |
| 4 | Metabolism of xenobiotics by cytochrome P450 | 2.62x10 <sup>-10</sup> | <i>Gstm1; Gsto1; Gstt4; Mgst1; Mgst2; Ugt1a6a; Ugt1a6b; Ugt1a7c; Aldh1a3; Aldh3a1; Gsta4; Gsta3; Ugt1a5; Cyp1b1</i>                                                                                                                  |
|   | Chemical carcinogenesis                      | 3.27x10 <sup>-8</sup>  | <i>Gstm1; Gsto1; Gstt4; Mgst1; Mgst2; Ugt1a6a; Ugt1a6b; Ugt1a7c; Aldh1a3; Aldh3a1; Gsta4; Gsta3; Ugt1a5; Cyp1b1</i>                                                                                                                  |
|   | Drug metabolism                              | 5.84x10 <sup>-8</sup>  | <i>Gstm1; Gsto1; Gstt4; Mgst1; Mgst2; Ugt1a6a; Ugt1a7c; Ugt1a6b; Aldh3a1; Aldh1a3; Ces2e; Gsta4; Gsta3; Ugt1a5; Xdh</i>                                                                                                              |
|   | IL-17 signaling pathway                      | 1.68x10 <sup>-7</sup>  | <i>Mmp1b; Mmp3; Cxcl3; Mmp9; Mapk13; Mapk11; Mmp13; Traf4; Ccl7; Traf5; Ikbkg; Ikbke; S100a8</i>                                                                                                                                     |
|   | Pathways in cancer                           | 1.02x10 <sup>-6</sup>  | <i>Mmp1b; Csf1r; Notch3; Il23r; Gstt4; Mgst1; Mgst2; Adcy1; Calml4; Lpar4; Fgf7; Casp7; Fgf9; Pmaip1; Ikbkg; Bid; Gstm1; Fzd4; Gsto1; Gadd45a; Ifngr2; Fzd6; Vegfc; Traf1; Mmp9; Traf4; Gsta4; Gsta3; Col4a4; Traf5; Mdm2; Pparg</i> |
| 5 | Proximal tubule bicarbonate reclamation      | 5.81x10 <sup>-5</sup>  | <i>Fxyd2; Atp1a2; Atp1b1; Slc38a3</i>                                                                                                                                                                                                |
|   | Mineral absorption                           | 7.01x10 <sup>-5</sup>  | <i>Fxyd2; Trf; Atp1a2; Mt2; Atp1b1</i>                                                                                                                                                                                               |
|   | Cytokine-cytokine receptor interaction       | 1.58x10 <sup>-4</sup>  | <i>Gdf10; Il15ra; Bmp3; Tnfsf14; Mstn; Amhr2; Il15; Ccl5; Cxcl13; Ccr3; Il27ra</i>                                                                                                                                                   |
|   | Carbohydrate digestion and absorption        | 8.34x10 <sup>-4</sup>  | <i>Fxyd2; Atp1a2; Amy1; Atp1b1</i>                                                                                                                                                                                                   |
|   | Intestinal immune network for IgA production | 8.34x10 <sup>-4</sup>  | <i>H2-dmb2; Il15ra; Il15; Madcam1</i>                                                                                                                                                                                                |

**Table S3** Enriched pathways of genes in response to IL-1 $\beta$  at each time point.

|                       | Pathway                                | P-value                                                                                                                                                                                                    | Genes                                                                                                                                                                                                                                                                                                                                                                                                                                                                                                                                                                                                                           |
|-----------------------|----------------------------------------|------------------------------------------------------------------------------------------------------------------------------------------------------------------------------------------------------------|---------------------------------------------------------------------------------------------------------------------------------------------------------------------------------------------------------------------------------------------------------------------------------------------------------------------------------------------------------------------------------------------------------------------------------------------------------------------------------------------------------------------------------------------------------------------------------------------------------------------------------|
| 4 hr                  | TNF signaling pathway                  | 6.37x10 <sup>-23</sup>                                                                                                                                                                                     | <i>Cebpb; Csf2; Csf1; Tnfaip3; Cxcl1; Nod2; Cxcl3; Ptgs2; Tnf; Cxcl2; Cx3cl1; Icam1; Socs3; Ccl5; Ccl2; Junb; Edn1; Vcam1; Ccl20; Mmp3; Lif; Ifi47; Traf1; Sele; Mmp9; Nfkb1; Nfkbia; Cxcl10; Mapk11; Il6; Irf1; Bcl3; Fas; Creb5; Birc3</i>                                                                                                                                                                                                                                                                                                                                                                                    |
|                       | Cytokine-cytokine receptor interaction | 4.90x10 <sup>-19</sup>                                                                                                                                                                                     | <i>Il21; Il1rn; Cd40; Csf3; Cxcl9; Csf2; Mstn; Csf1; Il1f9; Cxcl1; Cxcl3; Tnf; Cxcl2; Cx3cl1; Cxcl5; Cxcl16; Il18rap; Tnfsf10; Tnfsf11; Il12b; Tnfrsf8; Il13ra2; Il19; Il17re; Osmr; Il4ra; Il20rb; Il2rg; Acvr1b; Il1r1; Il1r2; Acvr1c; Ccl7; Ccl5; Ccl2; Ccr10; Tslp; Tnfsf14; Tnfsf15; Ccl20; Tgfb3; Tnfrsf9; Lif; Cxcl10; Bmp2; Il6; Il7; Tnfsf4; Fas; Tnfsf8</i>                                                                                                                                                                                                                                                           |
|                       | IL-17 signaling pathway                | 4.45E-16                                                                                                                                                                                                   | <i>Mmp1b; Csf3; Cebpb; Csf2; Tnfaip3; Cxcl1; Cxcl3; Ptgs2; Cxcl2; Tnf; Cxcl5; Ccl7; Ccl2; Ikbke; Ccl20; Mmp3; Il17re; Mmp9; Nfkb1; Nfkbia; Fosl1; Mapk11; Cxcl10; Il6; Mmp13; S100a8</i>                                                                                                                                                                                                                                                                                                                                                                                                                                        |
|                       | NOD-like receptor signaling pathway    | 1.02x10 <sup>-7</sup>                                                                                                                                                                                      | <i>Tnfaip3; Cxcl1; Nod2; Cxcl3; Tnf; Cxcl2; Ccl5; Casp4; Nlrp3; Ccl2; Gbp2; Ikbke; Camp; Gbp3; Gsdmd; Gbp5; Ifi207; Ifi204; Ripk2; Cybb; Nfkb1; Nfkbia; Mapk11; Il6; Aim2; Birc3</i>                                                                                                                                                                                                                                                                                                                                                                                                                                            |
|                       | Rheumatoid arthritis                   | 1.14x10 <sup>-7</sup>                                                                                                                                                                                      | <i>Mmp1b; H2-eb1; Csf2; Csf1; Tgfb3; Ccl20; Mmp3; Tnf; Cxcl5; Icam1; Il6; Ccl5; Cd28; Tnfsf11; Ccl2; Tlr2</i>                                                                                                                                                                                                                                                                                                                                                                                                                                                                                                                   |
|                       | NF-kappa B signaling pathway           | 3.49x10 <sup>-7</sup>                                                                                                                                                                                      | <i>Cd40; Vcam1; Tnfsf14; Tnfaip3; Traf1; Ptgs2; Tnf; Cxcl2; Nfkb1; Icam1; Nfkb2; Relb; Nfkbia; Plau; Tnfsf11; Card14; Birc3</i>                                                                                                                                                                                                                                                                                                                                                                                                                                                                                                 |
| 12 hr                 | Cytokine-cytokine receptor interaction | 1.06x10 <sup>-15</sup>                                                                                                                                                                                     | <i>Il21; Il1rn; Csf3; Cxcl9; Mstn; Csf1; Amhr2; Il1f9; Cxcl1; Cxcl3; Tnf; Cxcl14; Cxcl2; Eda2r; Cx3cl1; Cxcl5; Bmp15; Il18rap; Ccl27a; Tnfsf11; Il13ra2; Il11; Ngf; Prlr; Ccl12; Il4ra; Csf2rb; Il2rg; Il1r1; Il1r2; Ccl9; Ccl7; Ccl5; Ccl2; Il12rb1; Ccr1; Gdf10; Il33; Tnfsf15; Ccl20; Gdf15; Tnfrsf9; Lif; Bmp2; Il6; Il7; Tnfsf4; Tnfsf9; Cd27; Fas; Tnfsf8; Il17a</i>                                                                                                                                                                                                                                                      |
|                       | TNF signaling pathway                  | 5.77x10 <sup>-13</sup>                                                                                                                                                                                     | <i>Cebpb; Ccl12; Csf1; Tnfaip3; Cxcl1; Nod2; Cxcl3; Ptgs2; Tnf; Cxcl2; Cx3cl1; Icam1; Ccl5; Ccl2; Mlkl; Ccl20; Mmp3; Lif; Traf1; Sele; Mmp9; Nfkbia; Mapk11; Il6; Irf1; Fas; Creb5; Birc3</i>                                                                                                                                                                                                                                                                                                                                                                                                                                   |
|                       | IL-17 signaling pathway                | 7.89x10 <sup>-11</sup>                                                                                                                                                                                     | <i>Mmp1b; Csf3; Cebpb; Ccl12; Ccl20; Mmp3; Tnfaip3; Cxcl1; Cxcl3; Ptgs2; Cxcl2; Tnf; Mmp9; Cxcl5; Nfkbia; Fosl1; Mapk11; Il6; Mmp13; Ccl7; Ccl2; S100a8; Il17a</i>                                                                                                                                                                                                                                                                                                                                                                                                                                                              |
|                       | Pathways in cancer                     | 4.39x10 <sup>-9</sup>                                                                                                                                                                                      | <i>Mmp1b; Calml4; Gli1; Fgf7; Bdkrb1; Prkcb; Gsto1; Dcc; Dapk2; Mitf; Traf1; Wnt16; Mmp9; Agr1a; Rarb; Met; Birc3; Ptger4; Camk2b; Gstp2; Epas1; Gstp1; Notch4; Tcf7; Pdgb; Il4ra; Pdga; Lpar3; Csf2rb; Lpar4; Ptgs2; Il2rg; Hmox1; Pmaip1; Bid; Il12rb1; EglN1; Amt2; Nqo1; Wnt10a; EglN3; Nos2; Wnt7b; Txnrd1; Fzd8; Vegfc; Igf1; Nfkb2; Vegfa; Nfkbia; Bmp2; Il6; Gsta4; Gsta3; Il7; Gsta1; Mdm2; Fas; Gstm7; Fgfr3</i>                                                                                                                                                                                                      |
|                       | Rheumatoid arthritis                   | 2.50x10 <sup>-8</sup>                                                                                                                                                                                      | <i>Mmp1b; Il11; Ccl12; Csf1; Ccl20; Cd80; Mmp3; Tnf; Cxcl5; Icam1; Vegfa; H2-dmb2; Il6; Ccl5; Ctla4; Tnfsf11; Ccl2; Tlr2; Il17a</i>                                                                                                                                                                                                                                                                                                                                                                                                                                                                                             |
| 24 hr                 | TNF signaling pathway                  | 2.81x10 <sup>-16</sup>                                                                                                                                                                                     | <i>Cebpb; Csf1; Tnfaip3; Cxcl1; Nod2; Cxcl3; Tnf; Cxcl2; Cx3cl1; Icam1; Socs3; Ccl5; Creb3l2; Ccl2; Junb; Ccl20; Mmp3; Lif; Ifi47; Traf2; Traf1; Sele; Mmp9; Nfkbia; Cxcl10; Mapk11; Il6; Irf1; Bcl3; Traf5; Fas; Creb5; Birc3</i>                                                                                                                                                                                                                                                                                                                                                                                              |
|                       | IL-17 signaling pathway                | 3.01x10 <sup>-15</sup>                                                                                                                                                                                     | <i>Mmp1b; Csf3; Cebpb; Traf3ip2; Tnfaip3; Cxcl1; Cxcl3; Cxcl2; Tnf; Cxcl5; Ccl7; Ccl2; Ikbke; Ccl20; Mmp3; Traf2; Mmp9; Il17rb; Nfkbia; Fosl1; Mapk11; Cxcl10; Il6; Mmp13; Traf5; Lcn2; Il17d; S100a8; Il17a</i>                                                                                                                                                                                                                                                                                                                                                                                                                |
|                       | Cytokine-cytokine receptor interaction | 8.17x10 <sup>-15</sup>                                                                                                                                                                                     | <i>Il1rn; Cd40; Csf3; Cxcl9; Mstn; Csf1; Il23r; Il1f9; Cxcl1; Cxcl3; Tnf; Cxcl14; Cxcl2; Cx3cl1; Cxcl15; Cxcl5; Bmp15; Il18rap; Tnfsf11; Il12b; Il13ra2; Ifngr2; Il19; Osmr; Prlr; Il17rb; Edar; Il6st; Tnfrsf21; Il4ra; Il2rg; Acvr1b; Il1r1; Il1r2; Ccl9; Ccl7; Ccl5; Ccl2; Gdf10; Il33; Tnfsf15; Ccl20; Tnfrsf9; Lif; Cxcl10; Bmp2; Il6; Cxcl12; Cd27; Fas; Tnfsf8; Il17d; Il17a</i>                                                                                                                                                                                                                                         |
|                       | Pathways in cancer                     | 7.02x10 <sup>-9</sup>                                                                                                                                                                                      | <i>Mmp1b; Lamc3; Il23r; Calml3; Lamc2; Calml4; Fgf2; Gli2; Fgf7; Ednrb; Il12b; Rac3; Bdkrb1; Pim2; Gsto1; Dapk2; Ifngr2; Traf2; Traf1; Mmp9; Runx1; Traf5; Il6st; Met; Birc3; Ptger4; Camk2b; Epas1; Lama1; Ptger2; Il4ra; Mgst1; Pdga; Mgst2; Gstt1; Lpar3; Adcy1; Lpar4; Il2rg; Rasgrp2; Gng2; Wnt11; Bid; Fgf21; Fzd1; Arnt2; EglN3; Fzd2; Nos2; Fzd4; Fzd9; Vegfc; Lamb1; Nfkb2; Nfkbia; Bmp2; Il6; Cxcl12; Gsta4; Gsta3; Fgf18; Fas; Fgfr3</i>                                                                                                                                                                             |
|                       | Rheumatoid arthritis                   | 1.75x10 <sup>-8</sup>                                                                                                                                                                                      | <i>Mmp1b; Csf1; Ccl20; Cd80; Itgb2; Mmp3; Tnf; Cxcl5; Icam1; H2-dmb2; Il6; Cxcl12; Ccl5; Cd28; Ctla4; Tnfsf11; Ccl2; Tlr2; Atp6v1c2; Il17a</i>                                                                                                                                                                                                                                                                                                                                                                                                                                                                                  |
| 72 hr                 | Cytokine-cytokine receptor interaction | 2.21x10 <sup>-16</sup>                                                                                                                                                                                     | <i>Acvr1l; Il21; Il1rn; Cd40; Csf3; Cxcl9; Mstn; Il23r; Cxcl1; Tnfrsf13c; Cxcl13; Cxcl3; Cxcl14; Cxcl2; Cx3cl1; Cxcl15; Cxcl5; Bmp15; Il18rap; Tnfsf11; Il12b; Il13ra2; Il13ra1; Ifnar2; Il11; Il1r1; Il19; Lifr; Osmr; Ngf; Il17rb; Il17ra; Edar; Il3ra; Il6st; Tnfrsf21; Il4ra; Il20rb; Il6ra; Tnfrsf11b; Il2rg; Acvr1b; Il1r2; Ccl9; Ccl8; Ccl7; Ccl6; Ccl5; Ccl2; Il12rb1; Gdf10; Il33; Tnfsf14; Tnfsf15; Ccl20; Il10rb; Gdf15; Il34; Tnfrsf9; Lif; Inhbb; Gdf5; Bmp6; Inhbe; Cxcl10; Bmp3; Bmp2; Il6; Cxcl12; Cd27; Fas; Tnfsf8; Il17d</i>                                                                                 |
|                       | ECM-receptor interaction               | 7.86x10 <sup>-12</sup>                                                                                                                                                                                     | <i>Lamc3; Lama1; Itgb3; Lama3; Lamc2; Hmnr; Thbs2; Thbs1; Comp; Reln; Sv2c; Ibsp; Chad; Itgb8; Lamb3; Gp1bb; Itga1; Lamb1; Npnt; Col2a1; Col4a1; Col6a2; Itga10; Itga8; Col9a1; Itga7; Sdc1; Col9a3; Col9a2; Cd44</i>                                                                                                                                                                                                                                                                                                                                                                                                           |
|                       | Pathways in cancer                     | 5.42x10 <sup>-9</sup>                                                                                                                                                                                      | <i>Mmp1b; Lamc3; Il23r; Calml3; Lamc2; Pik3cb; Fgf1; Fgf2; Fgf7; Ednrb; Il12b; Rac3; Bdkrb1; Pim2; Il13ra1; Ifnar2; Pdgra; Prkcb; Dapk2; Hgf; Mmp2; Traf2; Mmp9; Pgf; Runx1; Plcb4; Col4a1; Il3ra; Pparg; Il6st; Birc3; Ptger4; Epas1; Lama1; Gstt4; Lama3; Il4ra; Mgst1; Mgst2; Tgfa; Il6ra; Gstt1; Lpar3; Adcy1; Lpar4; Adcy8; Il2rg; Rasgrp2; Kng2; Egfr; Kng1; Adcy5; Rasgrp3; Gng2; Wnt11; Abi1; Hes1; Il12rb1; Fgf21; Fzd1; Gstm2; Jag1; Jup; Lamb3; Nos2; Fzd4; Fzd6; Fzd9; Igf2; Vegfc; Vegfd; Lamb1; Igf1; Esr2; Nfkb2; Nfkbia; Bmp2; Il6; Cxcl12; Kitl; Gsta3; Fgf18; Bcl2; Fas; Kras; Gstm7; Fgfr3; Gstm6; Fgf10</i> |
|                       | IL-17 signaling pathway                | 1.26x10 <sup>-8</sup>                                                                                                                                                                                      | <i>Mmp1b; Csf3; Cebpb; Traf3ip2; Tnfaip3; Cxcl1; Cxcl3; Cxcl2; Cxcl5; Ccl7; Ccl2; Ikbke; Ccl20; Mmp3; Traf2; Mmp9; Il17rb; Il17ra; Nfkbia; Fosl1; Mapk11; Cxcl10; Il6; Mmp13; Lcn2; Il17d; S100a8</i>                                                                                                                                                                                                                                                                                                                                                                                                                           |
|                       | PI3K-Akt signaling pathway             | 4.67x10 <sup>-8</sup>                                                                                                                                                                                      | <i>Csf3; Lamc3; Itgb3; Lamc2; Pik3cb; Fgf1; Fgf2; Comp; Gys1; Fgf7; Ibsp; Itgb8; Ifnar2; Pdgra; Hgf; Itga1; Osmr; Ngf; Pgf; Ereg; Col2a1; Col4a1; Col6a2; Il3ra; Itga8; Itga7; Sgk3; Tlr2; Creb5; Pkn3; Lama1; Lama3; Il4ra; Tgfa; Lpar3; Il6ra; Lpar4; Il2rg; Thbs2; Thbs1; Egfr; Reln; Gng2; Erbb4; Chad; Fgf21; Ntrk2; Lamb3; Igf2; Vegfc; Vegfd; Lamb1; Igf1; Il6; Kitl; Itga10; Fgf18; Col9a1; Bcl2; Col9a3; Kras; Col9a2; Fgfr3; Fgf10</i>                                                                                                                                                                                |
| TNF signaling pathway | 6.79x10 <sup>-8</sup>                  | <i>Cebpb; Tnfaip3; Cxcl1; Pik3cb; Nod2; Cxcl3; Cxcl2; Cx3cl1; Socs3; Ccl5; Ccl2; Junb; Map3k5; Vcam1; Jag1; Ccl20; Mmp3; Lif; Ifi47; Traf2; Mmp9; Nfkbia; Cxcl10; Mapk11; Il6; Bcl3; Fas; Creb5; Birc3</i> |                                                                                                                                                                                                                                                                                                                                                                                                                                                                                                                                                                                                                                 |
|                       | Cell adhesion molecules (CAMs)         | 8.61x10 <sup>-8</sup>                                                                                                                                                                                      | <i>Cd274; H2-t23; Cd40; Cntnap1; H2-t22; Nlgn1; Nrnx1; H2-q6; H2-k1; Itgb2; H2-q7; H2-q4; Vsr; H2-dmb2; Ctla4; Itgb8; Madcam1; Jam2; Ntng1; Ntng2; Cadm3; H2-eb1; Vcam1; Icosl; L1cam; H2-aa; Selp; Cldn11; Cldn10; Vcan; Cd6; Cldn7; Cntn1; Cd28; Itga8; Sdc1; Siglec1; H2-q10</i>                                                                                                                                                                                                                                                                                                                                             |
|                       | Protein digestion and absorption       | 1.80x10 <sup>-7</sup>                                                                                                                                                                                      | <i>Kcnk5; Col17a1; Col15a1; Kcne3; Col14a1; Eln; Col11a1; Col11a2; Atp1a3; Atp1a2; Slc1a5; Slc8a1; Col10a1; Col27a1; Mme; Slc8a3; Col2a1; Slc7a8; Col4a1; Col6a2; Col5a3; Fxyd2; Col9a1; Col9a3; Col9a2</i>                                                                                                                                                                                                                                                                                                                                                                                                                     |



**Table S4** Enriched pathways of genes in response to TNF- $\alpha$  at each time point.

|                      | Pathway                                | P-value                                                                                                                                 | Genes                                                                                                                                                                                                                                                                                                                                                                                                                                                                                    |
|----------------------|----------------------------------------|-----------------------------------------------------------------------------------------------------------------------------------------|------------------------------------------------------------------------------------------------------------------------------------------------------------------------------------------------------------------------------------------------------------------------------------------------------------------------------------------------------------------------------------------------------------------------------------------------------------------------------------------|
| 4 hr                 | TNF signaling pathway                  | 1.73x10 <sup>-27</sup>                                                                                                                  | <i>Cebpb; Ccl12; Csf2; Csf1; Tnfaip3; Plk3cd; Cxcl1; Nod2; Cxcl3; Ptgs2; Tnf; Cxcl2; Cx3cl1; Icam1; Ccl5; Ccl2; Edn1; Vcam1; Mkl; Il15; Ccl20; Mmp3; Lif; Ifi47; Traf1; Sele; Mmp9; Nfkb1; Nfkbia; Mapk10; Cxcl10; Mapk11; Il6; Irf1; Fas; Birc3</i>                                                                                                                                                                                                                                     |
|                      | Cytokine-cytokine receptor interaction | 1.44x10 <sup>-22</sup>                                                                                                                  | <i>Il1rn; Cd40; Csf3; Cxcl9; Csf2; Csf1; Il1f9; Cxcl1; Cxcl3; Tnf; Cxcl2; Cx3cl1; Cxcl5; Cxcl16; Il18rap; Tnfsf11; Il13ra2; Il15ra; Il15; Tnfrsf19; Il23a; Csf1r; Ccl12; Il20rb; Cxcr4; Cxcr6; Tnfrsf11a; Il2rg; Il1r1; Il1r2; Ccl9; Ccl7; Ccl5; Ccl2; Il12rb2; Tslp; Tnfsf14; Tnfsf15; Ccl20; Il10rb; Lif; Cxcl10; Bmp2; Il6; Il7; Tnfsf4; Lep; Fas; Il17a</i>                                                                                                                          |
|                      | IL-17 signaling pathway                | 1.59x10 <sup>-18</sup>                                                                                                                  | <i>Mmp1b; Csf3; Cebpb; Ccl12; Csf2; Tnfaip3; Cxcl1; Cxcl3; Ptgs2; Cxcl2; Tnf; Cxcl5; Ccl7; Ccl2; Ccl20; Mmp3; Mmp9; Nfkb1; Nfkbia; Mapk10; Fosl1; Mapk11; Cxcl10; Il6; Mmp13; Il17a</i>                                                                                                                                                                                                                                                                                                  |
|                      | Rheumatoid arthritis                   | 6.64x10 <sup>-12</sup>                                                                                                                  | <i>Mmp1b; Ccl12; Csf2; Csf1; Il15; Ccl20; Mmp3; Tnfrsf11a; Tnf; H2-aa; Cxcl5; Icam1; Il6; Il23a; Ccl5; Tnfsf11; Ccl2; Tlr2; Il17a</i>                                                                                                                                                                                                                                                                                                                                                    |
|                      | NF-kappa B signaling pathway           | 2.41x10 <sup>-10</sup>                                                                                                                  | <i>Cd40; Vcam1; Tnfsf14; Syk; Tnfaip3; Tnfrsf11a; Traf1; Ptgs2; Tnf; Cxcl2; Nfkb1; Malt1; Icam1; Nfkb2; Relb; Nfkbia; Plau; Tnfsf11; Birc3</i>                                                                                                                                                                                                                                                                                                                                           |
| 12 hr                | TNF signaling pathway                  | 9.65x10 <sup>-20</sup>                                                                                                                  | <i>Ccl12; Csf1; Tnfaip3; Plk3cd; Cxcl1; Nod2; Cxcl3; Ptgs2; Tnf; Cxcl2; Cx3cl1; Icam1; Ccl5; Ccl2; Edn1; Vcam1; Mkl; Ccl20; Mmp3; Lif; Ifi47; Traf1; Sele; Mmp9; Nfkbia; Cxcl10; Mapk11; Il6; Irf1; Traf5; Fas; Creb5; Birc3</i>                                                                                                                                                                                                                                                         |
|                      | Cytokine-cytokine receptor interaction | 1.48x10 <sup>-15</sup>                                                                                                                  | <i>Ccl12; Csf3; Cxcl9; Csf1; Amhr2; Il1f9; Cxcr4; Cxcl1; Cxcl3; Il2rg; Tnf; Cxcl2; Cx3cl1; Cxcl15; Cxcl5; Cxcl16; Il1r1; Il1r2; Ccl9; Il18rap; Acvr1c; Ccl7; Ccl5; Tnfsf10; Ccl2; Il13ra2; Gdf10; Il15ra; Il11; Tslp; Tnfsf14; Ccl20; Gdf15; Tnfrsf9; Lif; Gdf6; Ngf; Cxcl10; Bmp2; Il6; Il7; Tnfsf4; Tnfsf9; Fas; Tnfrsf25; Inha; Il17a</i>                                                                                                                                             |
|                      | IL-17 signaling pathway                | 2.38x10 <sup>-13</sup>                                                                                                                  | <i>Mmp1b; Csf3; Ccl12; Ccl20; Mmp3; Tnfaip3; Cxcl1; Cxcl3; Ptgs2; Cxcl2; Tnf; Mmp9; Cxcl5; Nfkbia; Fosl1; Mapk11; Cxcl10; Il6; Mmp13; Ccl7; Traf5; Ccl2; S100a8; Il17a</i>                                                                                                                                                                                                                                                                                                               |
|                      | NOD-like receptor signaling pathway    | 2.56x10 <sup>-11</sup>                                                                                                                  | <i>Ccl12; Oas1a; Tnfaip3; Cxcl1; Nod2; Cxcl3; Tnf; Cxcl2; Oas1g; Ccl5; Nlrp3; Ccl2; Gbp2; Camp; Gbp3; Gsdmd; Gbp5; Gbp7; Ifi207; Ifi204; Ripk2; Cybb; Tmem173; Nfkbia; Mapk11; Il6; Aim2; Oas2; Oas3; Traf5; Irf7; Txnip; Birc3</i>                                                                                                                                                                                                                                                      |
|                      | Epstein-Barr virus infection           | 2.89x10 <sup>-11</sup>                                                                                                                  | <i>H2-t22; H2-q6; H2-k1; H2-q4; Oas1a; Tnfaip3; Plk3cd; Tnf; Icam1; Oas1g; Relb; Bid; Entpd1; H2-eb1; Syk; Gadd45a; Ddx58; Isg15; H2-aa; Nfkb2; Tapbp; Nfkbia; Cxcl10; Mapk11; Il6; Oas2; Oas3; Traf5; Cyt; Irf7; Fas; Cd247; Nfkbie; Cd44; Tlr2</i>                                                                                                                                                                                                                                     |
| Rheumatoid arthritis | 8.78x10 <sup>-9</sup>                  | <i>Mmp1b; Il11; Ccl12; H2-eb1; Csf1; Ccl20; Cd80; Mmp3; Tnf; H2-aa; Cxcl5; Icam1; Vegfa; Il6; Ccl5; Ccl2; Tlr2; Il17a</i>               |                                                                                                                                                                                                                                                                                                                                                                                                                                                                                          |
| 24 hr                | TNF signaling pathway                  | 3.06x10 <sup>-18</sup>                                                                                                                  | <i>Csf1; Tnfaip3; Cxcl1; Nod2; Cxcl3; Tnf; Cxcl2; Cx3cl1; Icam1; Creb3l3; Ccl5; Ccl2; Edn1; Vcam1; Mkl; Ccl20; Mmp3; Lif; Ifi47; Traf1; Sele; Mmp9; Mapk13; Nfkbia; Cxcl10; Mapk11; Irf1; Traf5; Fas; Birc3</i>                                                                                                                                                                                                                                                                          |
|                      | Cytokine-cytokine receptor interaction | 1.89x10 <sup>-13</sup>                                                                                                                  | <i>Csf1r; Cxcl9; Csf1; Il23r; Il1f9; Cxcr4; Cxcl1; Cxcl13; Cxcl3; Il2rg; Tnf; Cxcl2; Cx3cl1; Il27ra; Cxcl16; Il1r1; Il1r2; Ccl9; Il18rap; Acvr1c; Ccl7; Ccl5; Ccl2; Il13ra2; Ccr3; Il15ra; Il33; Tslp; Ccl20; Gdf15; Lif; Ngf; Bmp4; Cxcl10; Bmp3; Bmp2; Tnfsf4; Lep; Tnfsf9; Fas; Il17a</i>                                                                                                                                                                                             |
|                      | NOD-like receptor signaling pathway    | 4.99x10 <sup>-12</sup>                                                                                                                  | <i>Oas1a; Tnfaip3; Cxcl1; Nod2; Cxcl3; Tnf; Cxcl2; Ccl5; Nlrp3; Ccl2; Gbp2; Camp; Gbp3; Gsdmd; Gbp5; Gbp7; Ifi207; Ifi204; Ripk2; Cybb; Tmem173; Mapk13; Nfkbia; Mapk11; Aim2; Oas2; Oas3; Traf5; Irf7; Txnip; Nfkbib; Birc3</i>                                                                                                                                                                                                                                                         |
|                      | IL-17 signaling pathway                | 9.66x10 <sup>-11</sup>                                                                                                                  | <i>Mmp1b; Ccl20; Mmp3; Tnfaip3; Cxcl1; Cxcl3; Cxcl2; Tnf; Mmp9; Mapk13; Nfkbia; Fosl1; Mapk11; Cxcl10; Mmp13; Ccl7; Traf5; Ccl2; S100a8; Il17a</i>                                                                                                                                                                                                                                                                                                                                       |
|                      | Epstein-Barr virus infection           | 4.34x10 <sup>-10</sup>                                                                                                                  | <i>H2-t22; H2-q6; H2-k1; H2-q7; H2-q4; Oas1a; Tnfaip3; Tnf; Icam1; Relb; Bid; Syk; Gadd45a; Isg15; H2-aa; Nfkb2; Tapbp; Mapk13; Nfkbia; Cxcl10; Mapk11; Oas2; Oas3; Traf5; Irf7; Fas; Cd247; Nfkbie; Cd44; Tlr2; Nfkbib</i>                                                                                                                                                                                                                                                              |
| 72 hr                | TNF signaling pathway                  | 3.35x10 <sup>-20</sup>                                                                                                                  | <i>Cebpb; Ccl12; Csf1; Tnfaip3; Cxcl1; Nod2; Cxcl3; Tnf; Cxcl2; Cx3cl1; Icam1; Casp7; Creb3l3; Ccl5; Ccl2; Ikbkg; Junb; Edn1; Vcam1; Mkl; Ccl20; Mmp3; Lif; Ifi47; Traf1; Tnfrsf1b; Sele; Mmp9; Mapk13; Nfkbia; Mapk10; Cxcl10; Mapk11; Il6; Irf1; Fas; Creb5; Birc3</i>                                                                                                                                                                                                                 |
|                      | Cytokine-cytokine receptor interaction | 9.89x10 <sup>-16</sup>                                                                                                                  | <i>Cntfr; Cxcl9; Mstn; Csf1; Il23r; Il1f9; Cxcl1; Cxcl3; Tnf; Cxcl14; Cxcl2; Cx3cl1; Cxcl15; Cxcl16; Bmp15; Il18rap; Il13ra2; Il11; Ifngr2; Il19; Il17re; Tnfrsf1b; Ngf; Prr; Csf1r; Ccl12; Il20rb; Cxcr4; Tnfrsf11a; Il2rg; Il1r1; Il1r2; Ccl9; Ccl8; Ccl7; Ccl5; Ccl2; Il12rb1; Gdf10; Tslp; Tnfsf14; Tnfsf15; Ccl20; Gdf15; Il34; Tnfrsf9; Lif; Bmp8a; Gdf5; Cxcl10; Bmp2; Il6; Tnfsf4; Lep; Tnfsf9; Fas</i>                                                                          |
|                      | IL-17 signaling pathway                | 4.44x10 <sup>-12</sup>                                                                                                                  | <i>Mmp1b; Cebpb; Ccl12; Tnfaip3; Cxcl1; Cxcl3; Cxcl2; Tnf; Ccl7; Ccl2; Ikbkg; Ikbke; Ccl20; Mmp3; Il17re; Mmp9; Mapk13; Nfkbia; Mapk10; Fosl1; Mapk11; Cxcl10; Il6; Mmp13; Traf4; S100a8</i>                                                                                                                                                                                                                                                                                             |
|                      | Fluid shear stress and atherosclerosis | 1.04x10 <sup>-10</sup>                                                                                                                  | <i>Ccl12; Prkaa2; Gstt4; Pdgfb; Mgst1; Calml3; Calml4; Tnf; Prkcz; Actg1; Icam1; Nppc; Hmox1; Ccl2; Ikbkg; Mef2c; Edn1; Vcam1; Cav3; Gsto1; Sele; Mmp9; Ass1; Mapk13; Vegfa; Mapk10; Mapk11; Gsta4; Gsta3; Gsta1</i>                                                                                                                                                                                                                                                                     |
|                      | ECM-receptor interaction               | 9.57x10 <sup>-10</sup>                                                                                                                  | <i>Lama2; Lamc3; Itga2; Tnc; Lamc2; Thbs2; Thbs4; Col1a1; Col2a1; Reln; Col1a2; Ibsp; Sv2b; Col4a4; Chad; Itga11; Col9a1; Itgb7; Col9a3; Col9a2; Cd44; Itga9</i>                                                                                                                                                                                                                                                                                                                         |
|                      | Pathways in cancer                     | 1.38x10 <sup>-9</sup>                                                                                                                   | <i>Mmp1b; Lamc3; Il23r; Calml3; Lamc2; Calml4; Gli1; Fgf7; Casp7; Bdkrb1; Ikbkg; Edn1; Gsto1; Dapk2; Ifngr2; Itga2; Traf1; Mmp9; Agtr1a; Traf4; Col4a4; Met; Birc3; Camk2b; Csf1r; Notch3; Lama2; Ptger2; Gstt4; Pdgfb; Mgst1; Cxcr4; Adcy1; Lpar4; Il2rg; Hmox1; Pmaip1; Gng8; Bid; Il12rb1; EglN1; Arnt2; Wnt10a; EglN3; Fzd2; Gstm1; Gadd45b; Nos2; Fzd4; Gadd45a; Txnrd1; Fzd6; Fzd8; Vegfc; Agt; Nfkb2; Vegfa; Nfkbia; Mapk10; Bmp2; Il6; Gsta4; Gsta3; Gsta1; Mdm2; Fas; Fgfr3</i> |
|                      | Protein digestion and absorption       | 5.02x10 <sup>-9</sup>                                                                                                                   | <i>Col18a1; Col15a1; Col27a1; Kcne3; Eln; Col11a1; Col22a1; Col11a2; Atp1a3; Atp1b1; Slc8a1; Col1a1; Col3a1; Col2a1; Col1a2; Slc7a8; Col5a1; Col4a4; Col5a3; Col9a1; Col9a3; Col9a2</i>                                                                                                                                                                                                                                                                                                  |
|                      | PI3K-Akt signaling pathway             | 1.26x10 <sup>-8</sup>                                                                                                                   | <i>Csf1; Lamc3; Tnc; Lamc2; Areg; Fgf7; Creb3l3; Ibsp; Itgb7; Ikbkg; Syk; Itga2; Ngf; Prr; Ereg; Col2a1; Col4a4; Ddit4; Met; EphA2; Tlr2; Creb5; Itga9; Csf1r; Prkaa2; Lama2; Pdgfb; Lpar4; Il2rg; Thbs2; Thbs4; Plk3r5; Reln; Chad; Gng8; Pck1; Angpt4; Vegfc; Vegfa; Col1a1; Il6; Col1a2; Ppp2r2c; Itga11; Col9a1; Mdm2; Col9a3; Col9a2; Fgfr3</i>                                                                                                                                     |
|                      | Pertussis                              | 2.07x10 <sup>-7</sup>                                                                                                                   | <i>C1qb; C1qa; Nos2; Itgb2; Calml3; Calml4; Tnf; C2; Mapk13; C3; Mapk10; Mapk11; Casp7; Il6; C1s1; Irf1; Nlrp3; C1qc</i>                                                                                                                                                                                                                                                                                                                                                                 |
| Rheumatoid arthritis | 2.09x10 <sup>-7</sup>                  | <i>Mmp1b; Il11; Ccl12; Csf1; Ccl20; Cd80; H2-dma; Itgb2; Mmp3; Tcigr1; Tnfrsf11a; Tnf; Icam1; Vegfa; H2-dmb2; Il6; Ccl5; Ccl2; Tlr2</i> |                                                                                                                                                                                                                                                                                                                                                                                                                                                                                          |
